# Supplementary material
Source: publisher figshare collection journal article supplement (https://tandf.figshare.com/ndownloader/files/14478527)

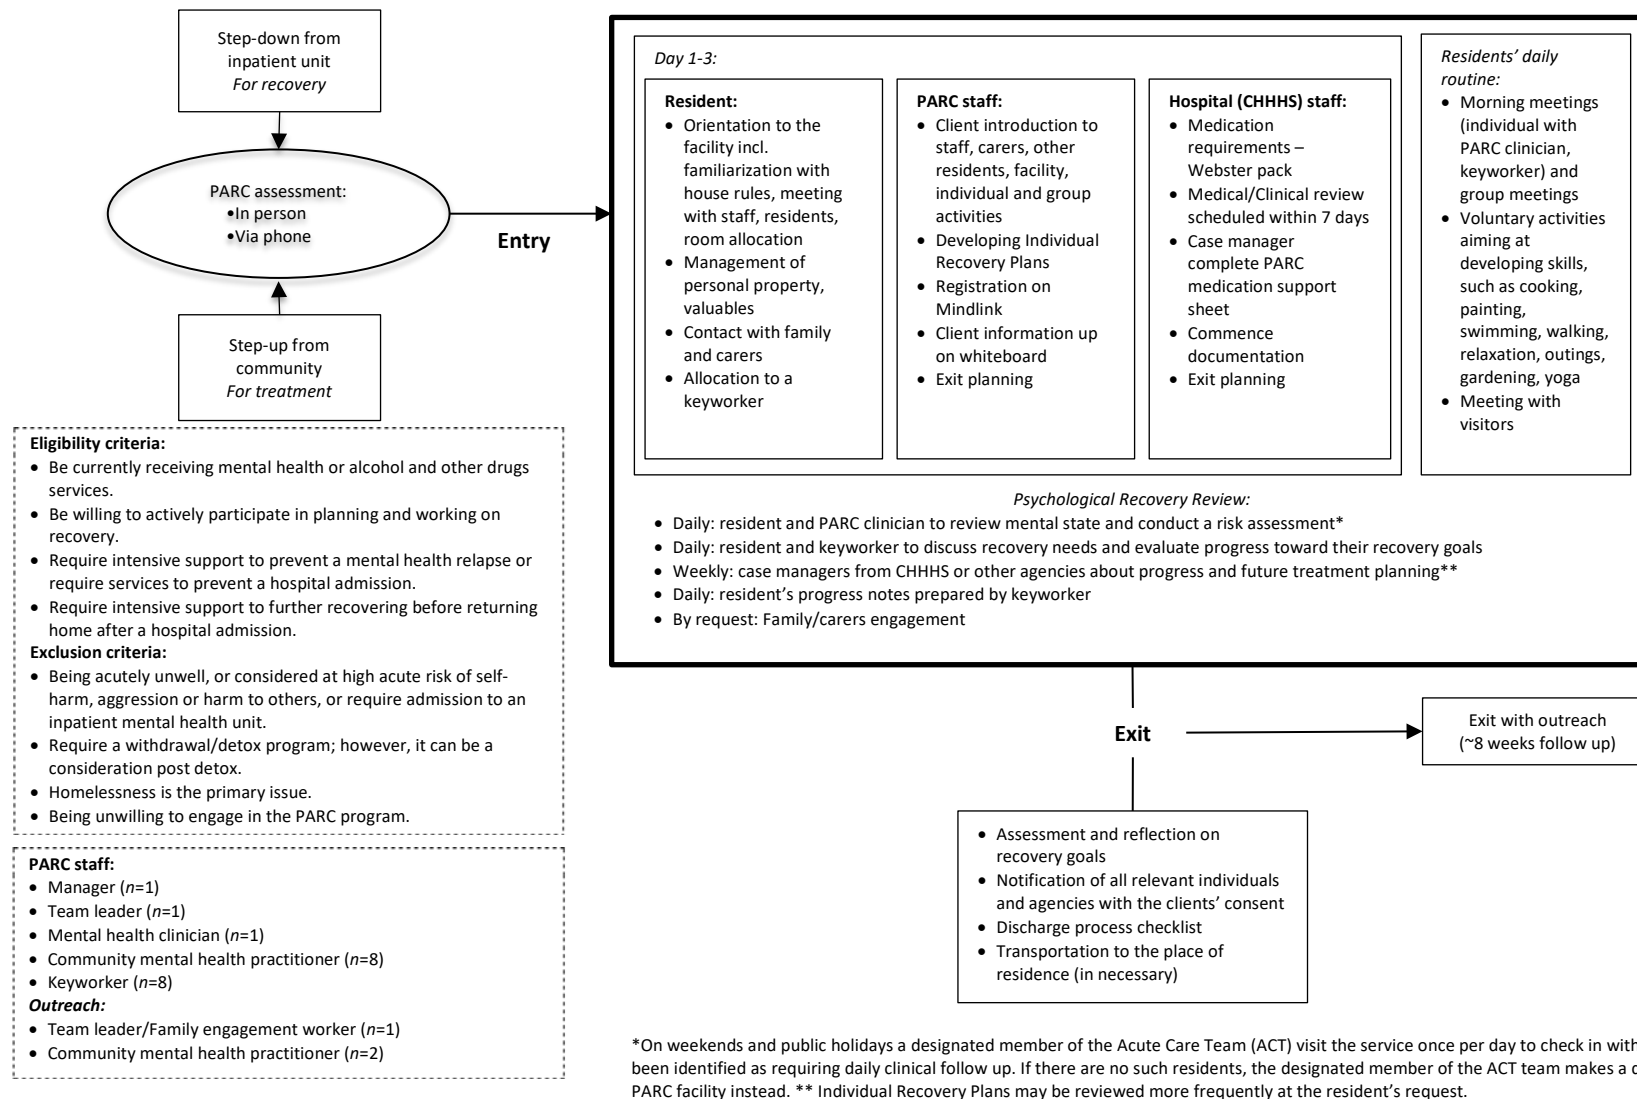

Figure 2. Schematic of the PARC service in Cairns

Supplement: Supplementary file 1 [file 14478527]
